# Supplementary material for: Chromatin profiling in human neurons reveals aberrant roles for histone acetylation and BET family proteins in schizophrenia
Source: PubMed Central journal article supplement (PMC9033776; doi:10.1038/s41467-022-29922-0), 2022-04-22
Supplement: 41467_2022_29922_MOESM1_ESM.pdf [file 41467_2022_29922_MOESM1_ESM.pdf]

## **Supplementary Information File**

### **Chromatin profiling in human neurons reveals aberrant roles for histone acetylation and BET family proteins in schizophrenia**

Lorna A. Farrelly, Shuangping Zheng, Nadine Schrode, Aaron Topol, Natarajan V. Bhanu, Ryan M. Bastle, Aarthi Ramakrishnan, Jennifer C Chan, Bulent Cetin, Erin Flaherty, Li Shen, Kelly Gleason, Carol A. Tamminga, Benjamin A. Garcia, Haitao Li, Kristen J. Brennand, Ian Maze

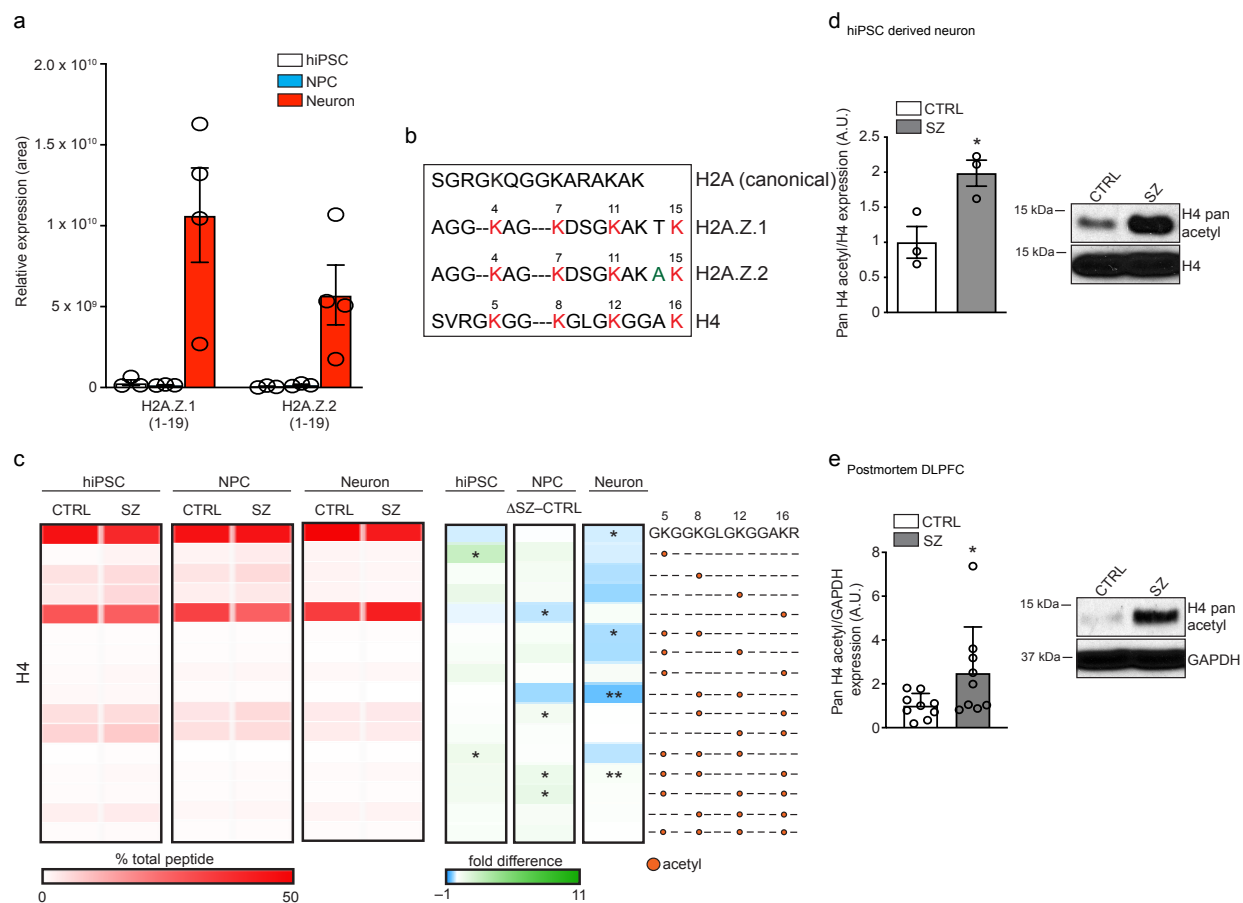

### Supplementary Figure 1: H4 hyper-acetylation in SZ neurons.

**(a)** Relative expression of histone variant proteins H2AZ.1 and H2AZ.2 across control (non-disease) hiPSCs ( $n = 3$ ), NPCs ( $n = 3$ ) and neurons ( $n = 4$ ). **(b)** Amino acid sequence comparisons of the N-terminal tails of histone H2A.Z.1/2 and histone H4. **(c)** Heatmap depicting LC-MS/MS data for relative enrichment values of (un)modified and acetylated histone H4 in hiPSCs ( $n = 3$ /group), NPCs ( $n = 3$ /group) and neurons from SZ cases and matched controls ( $n = 4$ /group). Absolute values (% total peptide) for each peptide are provided. Fold differences between SZ vs. controls are represented (biologically independent replicates/cell-type/condition). Heatmap data represented as means,  $*p \leq 0.05$ ,  $**p \leq 0.01$  (two-tail Student's t-tests performed within cell-type, SZ vs. CTRL; adjustments were not made for multiple comparisons). Please see **Supplementary**

**Data 1** for LC-MS/MS source data. Increased patterns of H4 acetylation were confirmed via western blotting in **(d)** 4-week-old hiPSC neurons [ $n = 3$  (SZ) *vs.* 3 (CTRL) biologically independent replicates],  $*p=0.0278$  (two-tail Student's t-tests), and in **(e)** DLPFC from biologically independent postmortem SZ subjects *vs.* matched controls ( $n = 9$  per group; two-tail Student's t-tests),  $*p=0.0565$ . A.U. = Arbitrary Units (normalized to CTRL samples). Data are presented as averages  $\pm$  SEM. Source data are provided in Source Data files.



sequence alignment analysis **(d)**. Conserved key residues responsible for polyacetylated H2A.Z recognition are labeled with blue stars.



\*\*\*\* $p \leq 0.0001$  (two-tail Student's t-tests). A.U. = Arbitrary Units (normalized to DMSO samples).

Data are presented as averages  $\pm$  SEM. Source data are provided in Source Data files.

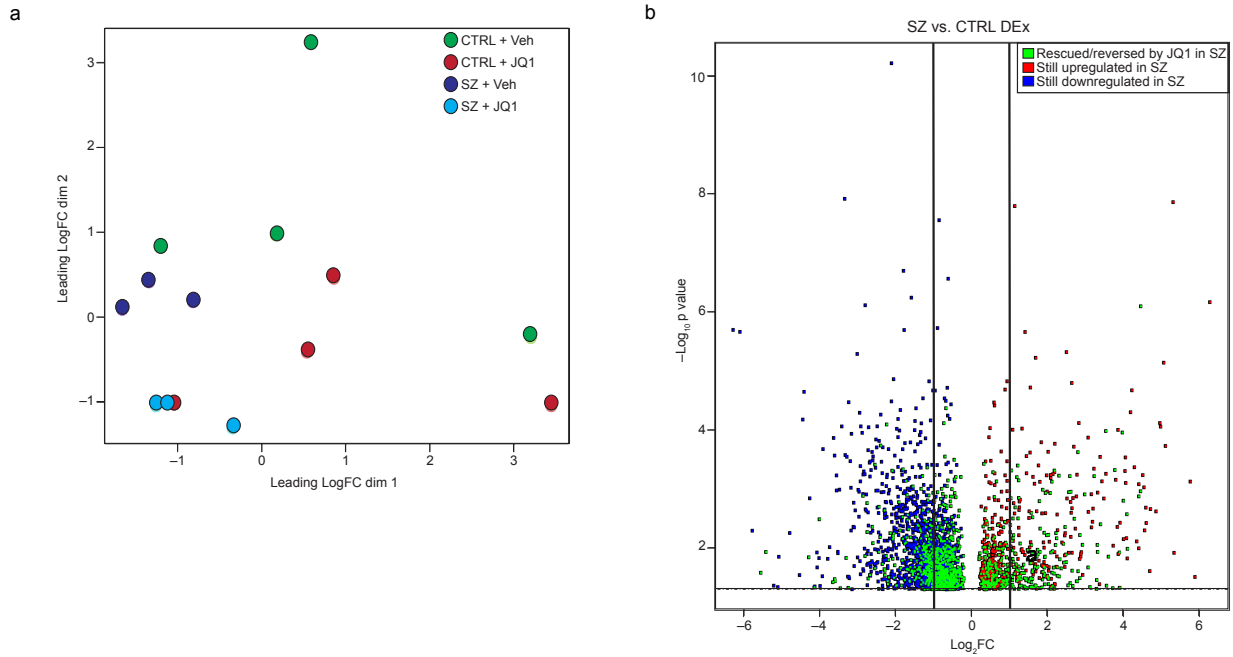

**Supplementary Figure 4: RNA-seq of SZ (SZ), control (CTRL) and JQ1-treated hiPSC-neurons.**

(a) Multidimensional scaling plot of gene expression  $\log_2$ FCs in all samples. (b) Volcano plot of differential expression in SZ hiPSC-neurons compared to controls, with significantly differentially expressed genes in SZ highlighted in blue and red, and genes whose differential expression was reversed by JQ1 treatment in green.



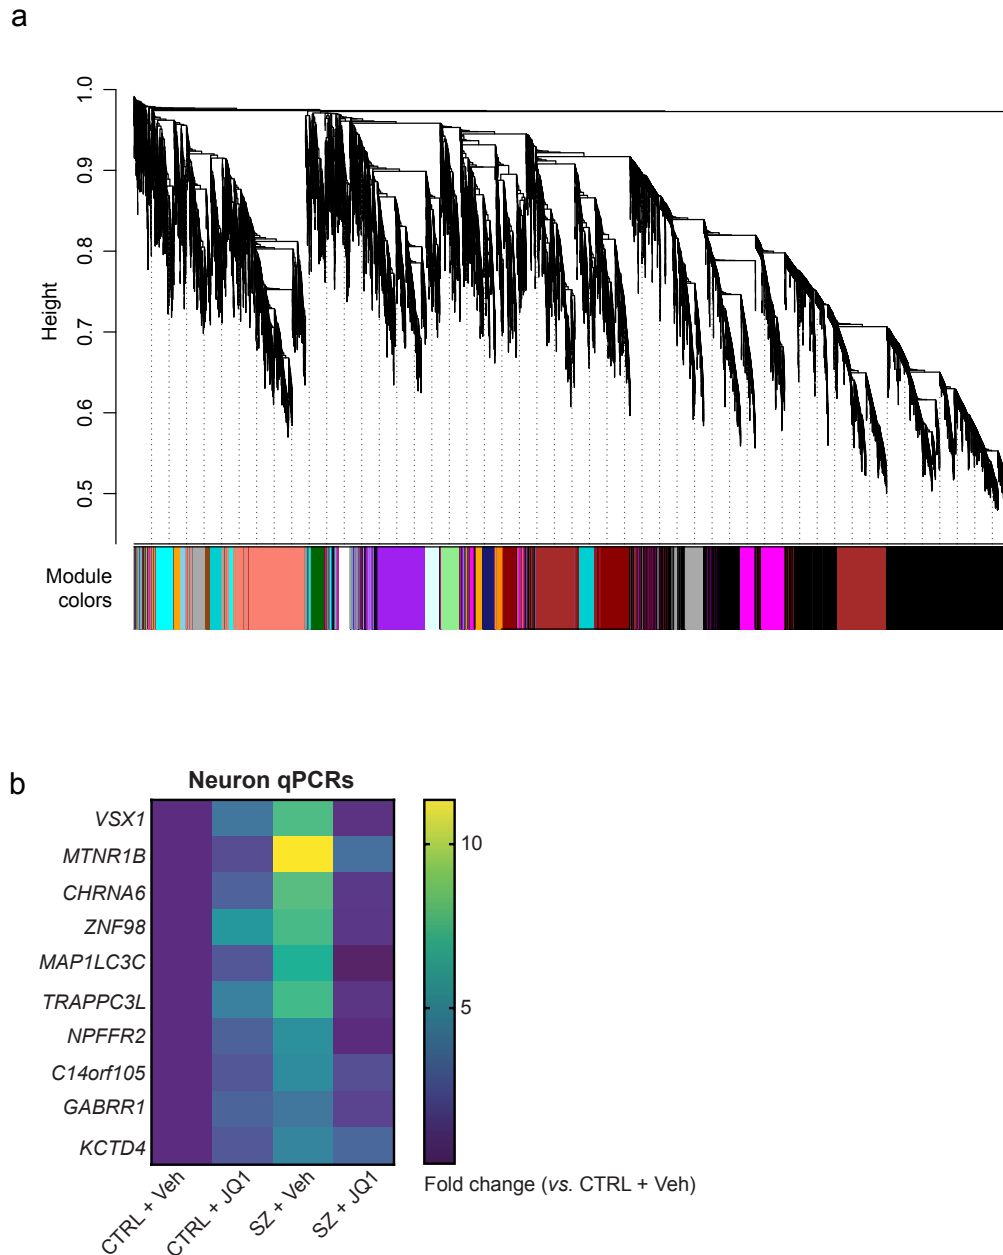

**Supplementary Figure 5: WGCNA and synergistic gene expression effects by JQ1**

(a) Hierarchical clustering of genes through topological overlap-based dissimilarity (top) and assigned module colors (bottom). (b) qPCRs of ten candidate SZ regulated genes (from RNA-seq) in hiPSC derived SZ vs. control neurons  $-/+$  JQ1.  $n = 3$  (SZ) - 4 (CTRL) biologically independent

replicates/condition. Heatmap data represented as means (normalized to CTRL + Veh). All genes were normalized to the housekeeping gene *18S*. Two-way ANOVA Interaction (SZ and JQ1) p-values: *VSXI* (0.0625), *MTNR1B* (0.0710), *CHRNA6* (0.0075), *ZNF98* (0.0641), *MAP1LC3C* (0.0422), *TRAPPC3L* (0.0758), *NPFFR2* (0.0643), *C14orf105* (0.0355), *GABRR1* (0.1149), *KCTD4* (0.0952). Source data are provided in Source Data files.

|                         | <b>Healthy controls<br/>(n=9)</b> | <b>Patients<br/>(n=9)</b> |
|-------------------------|-----------------------------------|---------------------------|
| <b>Age</b>              | 58.7                              | 47.7                      |
| <b>Sex (male, %)</b>    | 8 (88.8%)                         | 6 (66.6%)                 |
| <b>PMI</b>              | 19.27                             | 15.3                      |
| <b>RIN</b>              | 9.01                              | 8.6                       |
| <b>BMI</b>              | 29.5                              | 31.0                      |
| <i>Race</i>             |                                   |                           |
| <b>Caucasian</b>        | 8                                 | 5                         |
| <b>African American</b> | 0                                 | 4                         |
| <b>Other</b>            | 1                                 | 0                         |

**Supplementary Table 1: Demographic Parameters for Postmortem Healthy Controls and Patients**

| Data Collection                                         |                                  |
|---------------------------------------------------------|----------------------------------|
| Space group                                             | P2 <sub>1</sub> 2 <sub>1</sub> 2 |
| Unit Cell                                               |                                  |
| <i>a</i> , <i>b</i> , <i>c</i> (Å)                      | 59.2, 74.0, 32.4                 |
| $\alpha$ , $\beta$ , $\gamma$ (°)                       | 90, 90, 90                       |
| Resolution (Å)                                          | 50-1.5 (1.53-1.50)               |
| No. of unique reflections                               | 22,898 (1132)                    |
| <i>R</i> <sub>sym</sub> (%)                             | 4.1 (8.2)                        |
| <i>R</i> <sub>pim</sub> /CC1/2 (%)                      | 1.6 (3.4)/99.6(99.7)             |
| <i>I</i> / $\sigma$ ( <i>I</i> )                        | 63.7 (37.7)                      |
| Completeness (%)                                        | 98.0 (98.3)                      |
| Redundancy                                              | 7.5 (7.8)                        |
| Refinement (F>0)                                        |                                  |
| Resolution (Å)                                          | 24.3-1.5                         |
| No. of unique reflections                               | 22,859                           |
| <i>R</i> <sub>work</sub> / <i>R</i> <sub>free</sub> (%) | 15.6/17.7                        |
| No. of non-H atoms                                      |                                  |
| Protein                                                 | 959                              |
| Peptide                                                 | 51                               |
| Water                                                   | 177                              |
| Average B-factors (Å <sup>2</sup> )                     |                                  |
| Protein                                                 | 16.6                             |
| Peptide                                                 | 44.4                             |
| Water                                                   | 32.2                             |
| RMSD bonds (Å)                                          | 0.011                            |
| RMSD angle (°)                                          | 1.253                            |
| Ramachandran plot (%)                                   |                                  |
| Most favored                                            | 96.0                             |
| Additional allowed                                      | 4.0                              |

**Supplementary Table 2:** Crystallography Data Collection and Refinement Statistics

| <b>Gene</b>      | <b>Forward Primer</b> | <b>Reverse Primer</b> |
|------------------|-----------------------|-----------------------|
| <b>VSX1</b>      | GGTCTGGACAGCAGAGGAAG  | GGGAGCTCAGTTTTTCACAGC |
| <b>MTNR1B</b>    | CAAAGCCCTCTTGTCAAAGC  | AGCCAGGTCCTATGTGGATG  |
| <b>CHRNA6</b>    | GCTTCTTCCCTCAGTGTTGC  | CCTTGCAGCTGGAGGTAGTC  |
| <b>ZNF98</b>     | AGCCCAAAGCTTGAGAACA   | GGTGCATGGCACAATTACAG  |
| <b>MAP1LC3C</b>  | GCTGAGATCGTGCCACTACA  | GCTAGGTGTCCTCCAATCCA  |
| <b>TRAPPC3L</b>  | AGTTATGGACCTGCCACTG   | CTGGGAGCAGCATGTGACTA  |
| <b>NPFFR2</b>    | GAGTCAGTGGGCTGAGGAAG  | GCAAGGAGAGCCAGTTTGAC  |
| <b>C14orf105</b> | TCTGAAATGGGGAATCTTCG  | ATTTGTGCCATCCTCTGGAC  |
| <b>GABRR1</b>    | GGCTCGAGAACTACGTGAGG  | TGGAGGCTTTGCTCATTCT   |
| <b>KCTD4</b>     | CTTTCAGCTCAAGGGACTGG  | CTCCTCTGGAAATCCATCCA  |
| <b>18S</b>       | AAACGGCTACCACATCCAAG  | CCTCCAATGGATCCTCGTTA  |

**Supplementary Table 3: Human qPCR Primers**
