# Supplementary material for: Chromatin profiling in human neurons reveals aberrant roles for histone acetylation and BET family proteins in schizophrenia
Source: PubMed Central journal article supplement (PMC9033776; doi:10.1038/s41467-022-29922-0), 2022-04-22
Supplement: 41467_2022_29922_MOESM3_ESM.pdf [file 41467_2022_29922_MOESM3_ESM.pdf]

**Description of additional Supplementary data files**

Supplementary Data 1: LC-MS/MS quantifications of histone peptide/PTM ratios for hiPSCs, NPCs and neurons (4-week) comparing SZ vs. controls.
